# Supplementary material for: Tau PET burden in Brodmann areas 35 and 36 is associated with individual differences in cognition in non-demented older adults
Source: PubMed Central journal article supplement (PMC10757623; doi:10.3389/fnagi.2023.1272946), 2023-12-14
Supplement: Data_Sheet_1.pdf [file Data_Sheet_1.pdf]

## Supplementary Material

### **Tau PET Burden in Brodmann areas 35 and 36 is associated with individual differences in cognition in non-demented older adults**

Nisha Rani<sup>1†</sup>, Kylie H. Alm<sup>1†</sup>, Caitlin A. Corona-Long<sup>1</sup>, Caroline L. Speck<sup>1</sup>, Anja Soldan<sup>2</sup>, Corinne Pettigrew<sup>2</sup>, Yuxin Zhu<sup>2</sup>, Marilyn Albert<sup>2</sup>, Arnold Bakker<sup>1,2\*</sup>

† These authors contributed equally to this work and share first authorship.

\*Corresponding Author:  
Arnold Bakker, PhD  
Email: [abakker@jhu.edu](mailto:abakker@jhu.edu)

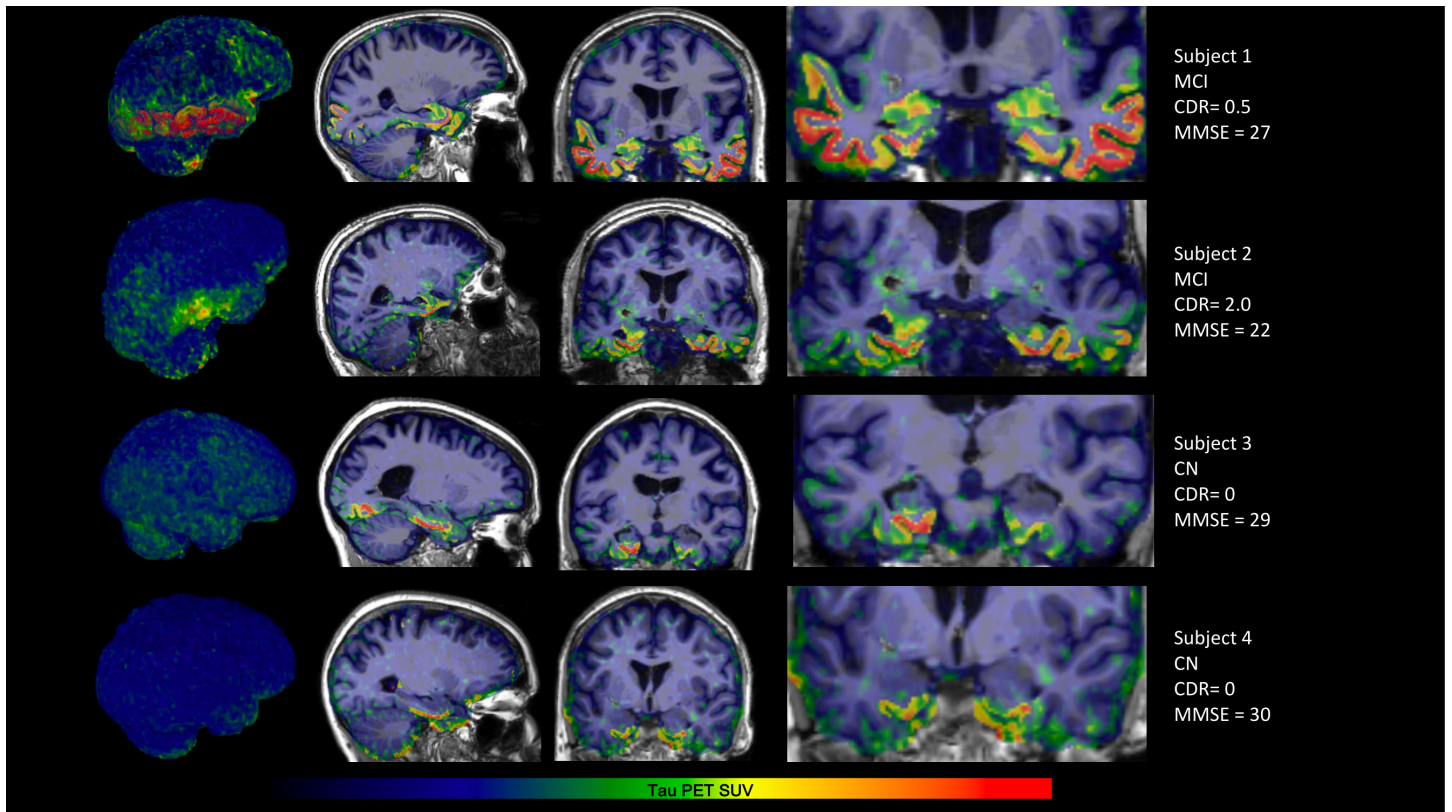

**Supplementary Figure 1.** Representative examples of  $^{18}\text{F}$ -MK6240 PET images registered to the subject's T1-weighted MRI, showcasing the PET-MRI registration and the distribution of the tracer in both MCI subjects (top two rows) and cognitively normal (CN) individuals (bottom two rows).

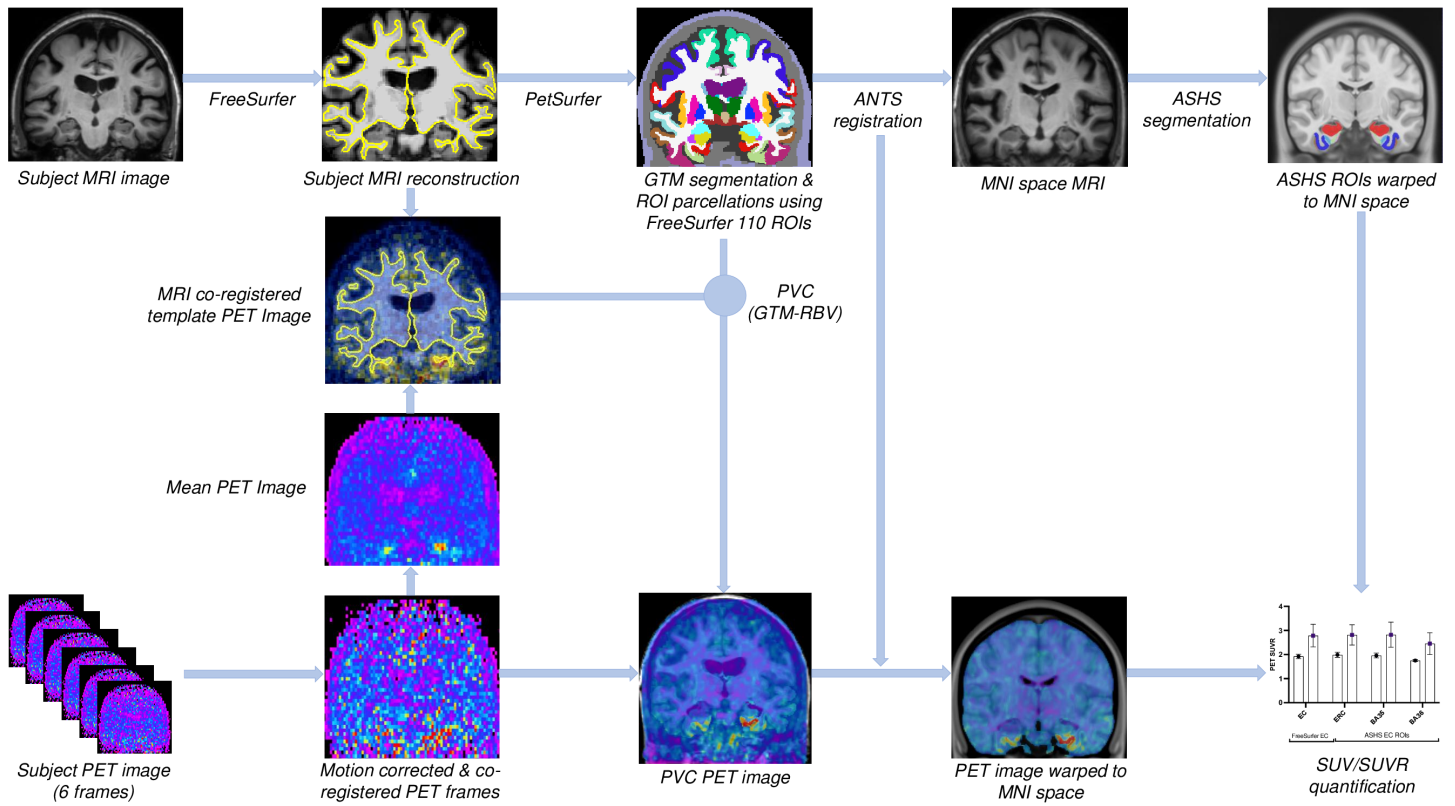

**Supplementary Figure 2.** PET image analysis pipeline steps.

**Supplementary Table 1.** Stepwise regression models with <sup>18</sup>F-MK6240 PET explaining variability in composite cognitive measures in left hemisphere models.

| Dependent variables             | Independent variables | $\beta$ | <i>t-value</i> | <i>F</i> | $\Delta F$ | <i>R</i> <sup>2</sup> | $\Delta R^2$ |
|---------------------------------|-----------------------|---------|----------------|----------|------------|-----------------------|--------------|
| <b>CDR-SB</b>                   |                       |         |                |          |            |                       |              |
| Step1                           |                       |         |                | 18.83*** |            | 0.18                  |              |
| Step2                           | Left BA36             | 0.42    | 4.34***        | 13.75*** | 7.32*      | 0.24                  | 0.06         |
|                                 | Left BA36             | 0.40    | 4.29***        |          |            |                       |              |
|                                 | Age                   | 0.25    | 2.71**         |          |            |                       |              |
| <b>MMSE</b>                     |                       |         |                |          |            |                       |              |
| Step1                           |                       |         |                | 6.58*    |            | 0.07                  |              |
|                                 | Age                   | -0.26   | -2.57*         |          |            |                       |              |
| <b>Language composite score</b> |                       |         |                |          |            |                       |              |
| Step1                           |                       |         |                | 12.93*** |            | 0.13                  |              |
| Step2                           | Education             | 0.36    | 3.60***        | 10.68*** | 7.47**     | 0.20                  | 0.07         |
|                                 | Education             | 0.36    | 3.78***        |          |            |                       |              |
|                                 | Left BA36             | -0.26   | -2.74**        |          |            |                       |              |

Variables entered into each model: age, sex, education, APOE4 carrier status, global amyloid burden, SUVR left EC (FreeSurfer), SUVR left ERC (ASHS), SUVR left BA36 (ASHS), SUVR left BA35 (ASHS). \**p* < .05; \*\**p* < .01; \*\*\**p* < .001.

**Supplementary Table 2.** Stepwise regression models with <sup>18</sup>F-MK6240 PET explaining variability in composite cognitive measures within cognitively normal participants only (N = 82).

| Dependent variables                            | Independent variables | $\beta$ | <i>t</i> -value | <i>F</i> | $\Delta F$ | <i>R</i> <sup>2</sup> | $\Delta R^2$ |
|------------------------------------------------|-----------------------|---------|-----------------|----------|------------|-----------------------|--------------|
| <b>CDR-SB</b><br>Step1                         | Left EC               | 0.24    | 2.19*           | 4.79*    |            | 0.06                  |              |
|                                                |                       |         |                 |          |            |                       |              |
| <b>CDR-SB</b><br>Step1<br>Step2                | Right BA35            | 0.24    | 2.14*           | 4.56*    |            | 0.06                  |              |
|                                                | Right BA35            | 0.99    | 3.07**          | 5.50**   | 6.14*      | 0.13                  | 0.07         |
|                                                | Right ERC             | -0.80   | -2.48*          |          |            |                       |              |
| <b>Delayed memory composite score</b><br>Step1 | Age                   | 0.23    | 2.05*           | 4.20*    |            | 0.05                  |              |
|                                                |                       |         |                 |          |            |                       |              |
| <b>Language composite score</b><br>Step1       | Education             | 0.41    | 3.97***         | 15.78*** |            | 0.17                  |              |
|                                                |                       |         |                 |          |            |                       |              |

Variables entered into each model: age, sex, education, APOE4 carrier status, global amyloid burden, SUVR EC (FreeSurfer), SUVR ERC (ASHS), SUVR BA36 (ASHS), SUVR BA35 (ASHS). \**p* < .05; \*\**p* < .01; \*\*\**p* < .001.

**Supplementary Table 3.** Stepwise regression models with <sup>18</sup>F-MK6240 PET explaining variability in composite cognitive measures within mild cognitive impairment participants only (N = 11).

| Dependent variables             | Independent variables | $\beta$ | <i>t</i> -value | <i>F</i> | $\Delta F$ | <i>R</i> <sup>2</sup> | $\Delta R^2$ |
|---------------------------------|-----------------------|---------|-----------------|----------|------------|-----------------------|--------------|
| <b>MMSE</b>                     |                       |         |                 |          |            |                       |              |
| Step1                           | Sex                   | 0.75    | 3.42**          | 11.66**  |            | 0.56                  |              |
| <b>Language composite score</b> |                       |         |                 |          |            |                       |              |
| Step1                           | Right BA36            | -0.71   | -2.98*          | 8.90*    |            | 0.50                  |              |

*Variables entered into each model: age, sex, education, APOE4 carrier status, global amyloid burden, SUVR EC (FreeSurfer), SUVR ERC (ASHS), SUVR BA36 (ASHS), SUVR BA35 (ASHS). \**p* < .05; \*\**p* < .01; \*\*\**p* < .001.*
